# Supplementary material for: Managing Cystic Fibrosis in Polish Healthcare
Source: MDPI journal article supplement (doi:10.3390/ijerph17207630), 2020-10-20
Supplement: s1 [file s1]

**Table S1.** Inclusion/exclusion criteria according to International Classification of Diseases, Ninth Revision (ICD-9) for procedures and International Classification of Diseases, Tenth Revision (ICD-10) for diagnosis.

|                                                |       |
|------------------------------------------------|-------|
| Cystic fibrosis with pulmonary manifestations  | E84.0 |
| Cystic fibrosis with intestinal manifestations | E84.1 |
| Cystic fibrosis with other manifestations      | E84.8 |
| Cystic fibrosis, unspecified                   | E84.9 |
